# Supplementary material for: Dental Disease in Rabbits (Oryctolagus cuniculus) and Its Risk Factors—A Private Practice Study in the Metropolitan Region of Chile
Source: MDPI journal article supplement (doi:10.3390/ani13040676), 2023-02-15
Supplement: s1 [file s1]

## Supplementary material

**Table S1.** Classification of rabbit breeds used in the present study (Own elaboration, based on previous data [17-19]).

| Breed           | Adult weight | Other features                                                                                                                                                                                                                           |
|-----------------|--------------|------------------------------------------------------------------------------------------------------------------------------------------------------------------------------------------------------------------------------------------|
| D <sup>1</sup>  | <2kg         | <ul style="list-style-type: none"> <li>• Round and compact bodies</li> <li>• Short noses, small ears, and a disproportionately large head size compared to body size, narrow in shape.</li> <li>• Small and short limb bones.</li> </ul> |
| Md <sup>2</sup> | 2-5 kg       | <ul style="list-style-type: none"> <li>• Longer bodies.</li> <li>• Longer noses, larger ears, head size proportional to body size, oval in shape.</li> <li>• Wider and longer limb bones.</li> </ul>                                     |
| L <sup>3</sup>  | >5kg         | <ul style="list-style-type: none"> <li>• Giant and robust bodies.</li> <li>• Wide and elongated head, with long ears (&gt;15cm).</li> <li>• Larger and stronger limb bones.</li> <li>• Dense fur.</li> </ul>                             |

D<sup>1</sup>= Dwarf, Md<sup>2</sup>= Medium, L<sup>3</sup>= Large.

**Table S2.** Frequency measurements for qualitative variables in patients diagnosed with ADD in a private veterinary clinic between the years 2018-2021.

| Variable             | Class | Categories     | AF <sup>1</sup> | RF <sup>2</sup> |
|----------------------|-------|----------------|-----------------|-----------------|
| Location             | 1     | C <sup>3</sup> | 200             | 0.554           |
|                      | 2     | I <sup>4</sup> | 93              | 0.258           |
|                      | 3     | P <sup>5</sup> | 68              | 0.188           |
| Sex                  | 1     | Female         | 138             | 0.382           |
|                      | 2     | Male           | 223             | 0.618           |
| Reproductive state   | 1     | Castrated      | 64              | 0.177           |
|                      | 2     | Intact         | 297             | 0.823           |
| Race                 | 1     | Dwarf          | 105             | 0.291           |
|                      | 2     | Large          | 12              | 0.033           |
|                      | 3     | Medium         | 244             | 0.676           |
| Body Condition Score | 1     | 1              | 1               | 0.003           |
|                      | 2     | 2              | 47              | 0.130           |

|                 |   |                 |     |       |
|-----------------|---|-----------------|-----|-------|
|                 | 3 | 3               | 259 | 0.717 |
|                 | 4 | 4               | 48  | 0.133 |
|                 | 5 | 5               | 6   | 0.017 |
| Type of housing | 1 | Caged           | 38  | 0.105 |
|                 | 2 | Mixed           | 129 | 0.357 |
|                 | 3 | Free range pets | 194 | 0.537 |
| Housing regimen | 1 | Indoor          | 267 | 0.740 |
|                 | 2 | Mixto           | 53  | 0.147 |
|                 | 3 | Outdoor         | 41  | 0.114 |
| Hay             | 1 | Absent          | 72  | 0.199 |
|                 | 2 | Present         | 289 | 0.801 |
| Pellet          | 1 | Absent          | 15  | 0.042 |
|                 | 2 | Present         | 346 | 0.958 |
| Vegetables      | 1 | Absent          | 80  | 0.222 |
|                 | 2 | Present         | 281 | 0.778 |
| Fruits          | 1 | Absent          | 106 | 0.294 |
|                 | 2 | Present         | 255 | 0.706 |

AF<sup>1</sup>= Absolute frequency, RF<sup>2</sup>= Relative frequency, C<sup>3</sup>= Cheek teeth, I<sup>4</sup>= Incisors, P<sup>5</sup>= All dental pieces.

**Table S3.** Clinical signs of patients with ADD in a private veterinary clinic between the years 2018-2021

| Clinical signs      | Affected system | AF |
|---------------------|-----------------|----|
| Gut stasis          | G <sup>1</sup>  | 1  |
| Anorexia            | G               | 27 |
| Hypomotility        | G               | 27 |
| Hyporexia           | G               | 57 |
| Diarrhea            | G               | 1  |
| Sialorrhea          | G               | 7  |
| Halitosis           | G               | 2  |
| Abscesses           | D <sup>2</sup>  | 33 |
| Perianal dermatitis | D               | 17 |
| Hirsute fur         | D               | 34 |
| Cheyletiellosis     | D               | 31 |
| Myiasis             | D               | 2  |
| Fleas               | D               | 2  |

|                   |                |    |
|-------------------|----------------|----|
| Otitis            | D              | 17 |
| Mange             | D              | 2  |
| Head tilting      | N <sup>3</sup> | 3  |
| Rolling           | N              | 1  |
| Epiphora          | O <sup>4</sup> | 81 |
| Sneezing          | O              | 25 |
| Nasal discharge   | O              | 17 |
| Conjunctivitis    | O              | 3  |
| Ocular dermatitis | O              | 1  |
| Exophthalmos      | O              | 6  |
| Dacryocystitis    | O              | 29 |
| Ocular proptosis  | O              | 3  |
| Bruxism           | N              | 3  |
| Depression        | N              | 12 |
| Nistagmus         | N              | 2  |
| Lethargy          | N              | 1  |

G<sup>1</sup>= Gastrointestinal, D<sup>2</sup>= Dermatologic, N<sup>3</sup>= Neurological, O<sup>4</sup>=Ocular.
